# Supplementary material
Source: publisher figshare collection journal article supplement (https://tandf.figshare.com/ndownloader/files/17292233)
Supplement: Supplementary file 1 [file 17292233]

**Supplementary Materials**

**
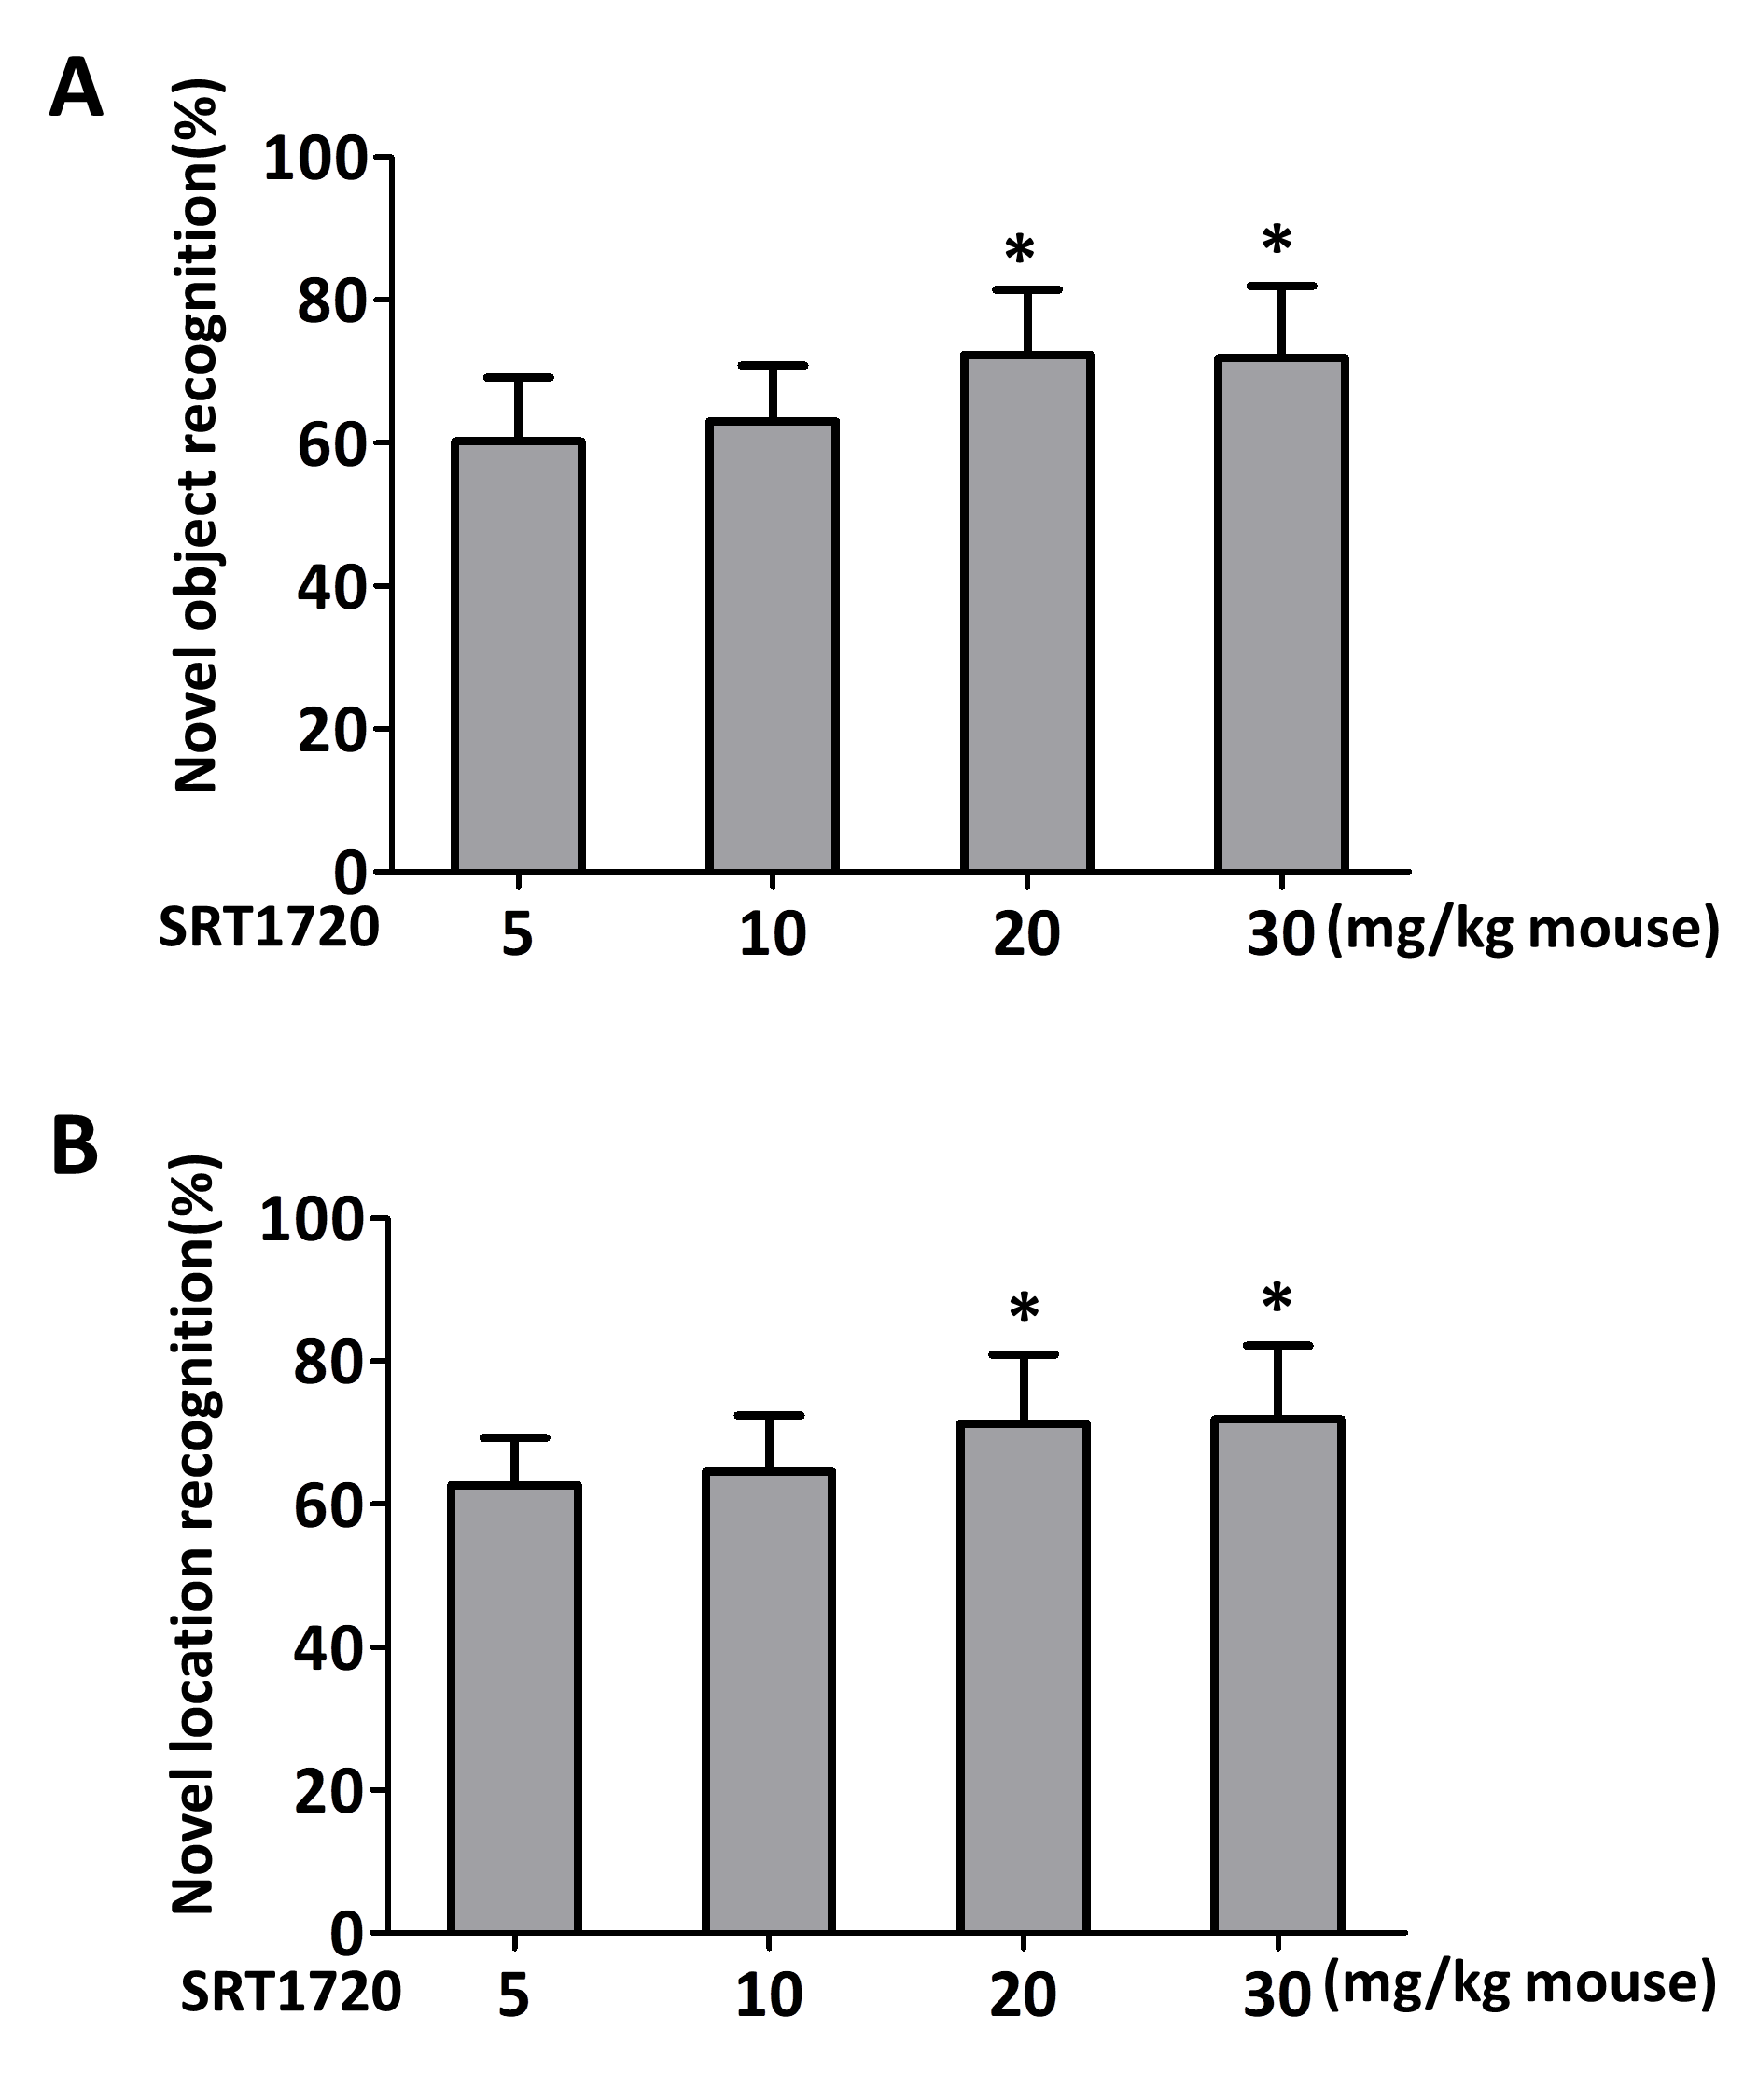
**

**Figure S1.** The dosage of SRT1720 was determined based on increasing novel object and novel location recognition after cardiac surgery induced POCD. (A) Novel object recognition in the novel object test. (B) Spatial recognition in the novel location test. C57BL/6 wild-type mice treated with SRT1720 5, 10, 20 and 30 mg/kg after cardiac surgery. Each value represents the mean ± SD of 6 mice in each group. *P<0.05 significant difference with 5 mg/kg group.
